# Supplementary material for: Molecular Architecture of Yeast Chromatin Assembly Factor 1
Source: PubMed Central journal article supplement (PMC4879628; doi:10.1038/srep26702), 2016-05-25
Supplement: srep26702-s1.pdf [file srep26702-s1.pdf]

## Molecular Architecture of Yeast Chromatin Assembly Factor 1

Daegeun Kim<sup>1,\*</sup>, Dheva Setiapura<sup>2,\*</sup>, Taeyang Jung<sup>1,3,\*</sup>, Jaehee Chung<sup>1</sup>, Alexander Leitner<sup>4</sup>, Jungmin Yoon<sup>1</sup>, Ruedi Aebersold<sup>4,5</sup>, Hans Hebert<sup>3</sup>, Calvin K. Yip<sup>2,#</sup>, Ji-Joon Song<sup>1,#</sup>

<sup>1</sup>Department of Biological Sciences, KAIST Institute for the BioCentury, Cancer Metastasis Control Center, KAIST, 291 Daehakro Yuseong Daejeon, 34141, Korea.

<sup>2</sup>Department of Biochemistry and Molecular Biology, The University of British Columbia, Vancouver, British Columbia, Canada, V6T 1Z3.

<sup>3</sup>Department of Biosciences and Nutrition, Karolinska Institute, and School of Technology and Health, KTH Royal Institute of Technology, Novum, SE-141 57, Sweden

<sup>4</sup>Department of Biology, Institute of Molecular Systems Biology, ETH Zurich, 8093 Zurich, Switzerland.

<sup>5</sup>Faculty of Science, University of Zurich, Zurich, Switzerland.

\* These authors contributed equally.

# Correspondence: [calvin.yip@ubc.ca](mailto:calvin.yip@ubc.ca) & [songj@kaist.ac.kr](mailto:songj@kaist.ac.kr)

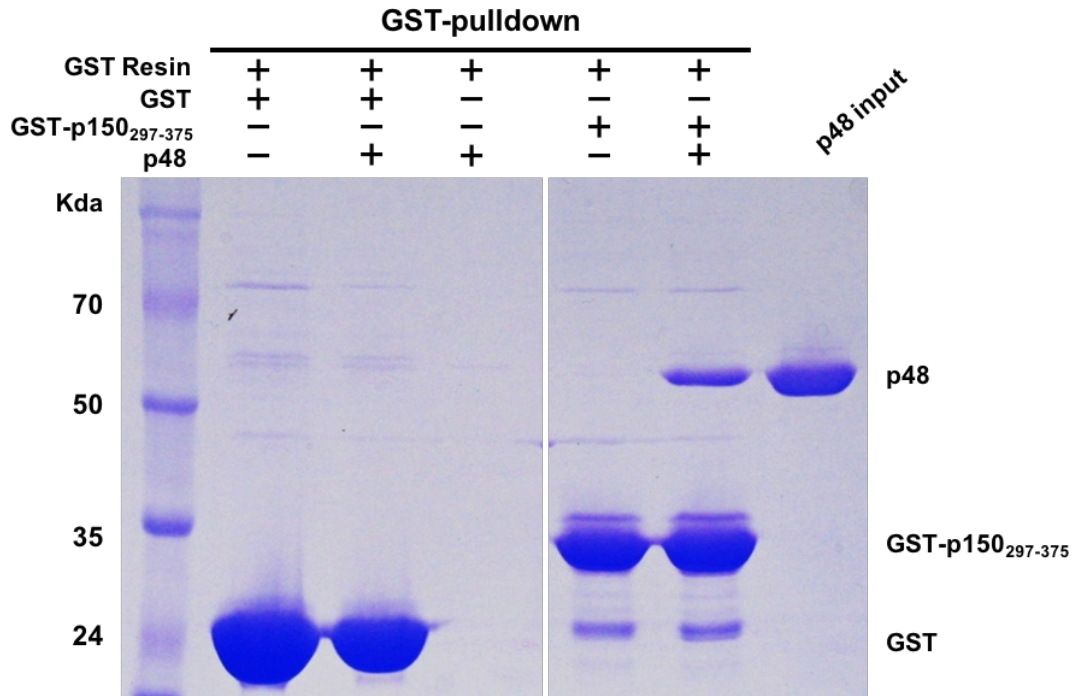

**Supplementary Figure 1. GST-pull down experiments showing that the middle region of the largest subunit interacts with p48 of Caf-1.**

The middle region of the largest subunit of human CAF-1 (p150<sub>297-375</sub>) was generated in GST fusion, and incubated with p48. p48 specifically interact with the middle region of p150 but not GST.

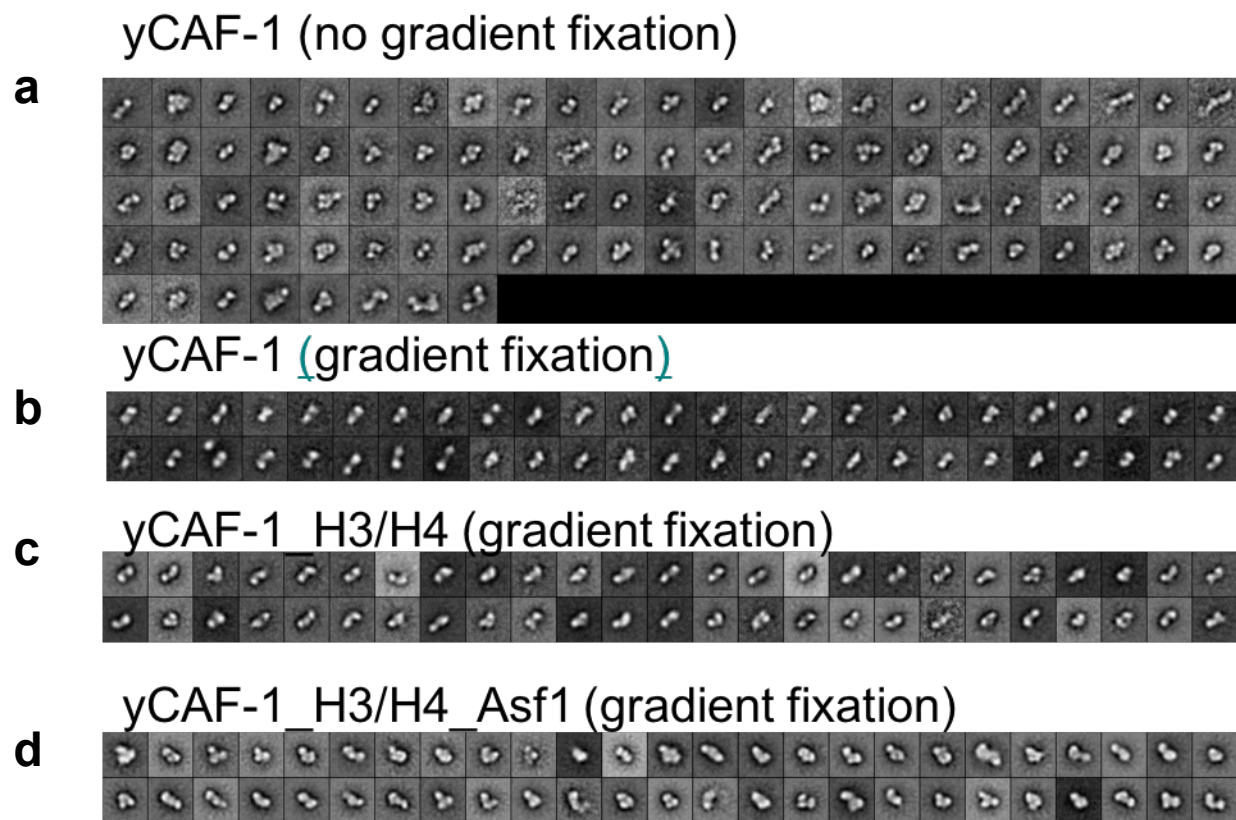

**Supplementary Figure 2. Galleries of yCAF-1 class averages from 2D negative stain EM analysis.**

(a) yCAF-1 complex prepared without gradient fixation stabilization (4,398 particles). Side length of all class averages shown is 374 Å. (b,c,d) yCAF-1 (4,260 particles), yCAF-1\_H3/H4 (5,044 particles), and yCAF-1\_H3/H4\_Asf1 complexes (8,735 particles) prepared with gradient fixation stabilization. Side length for these class averages is 336 Å.

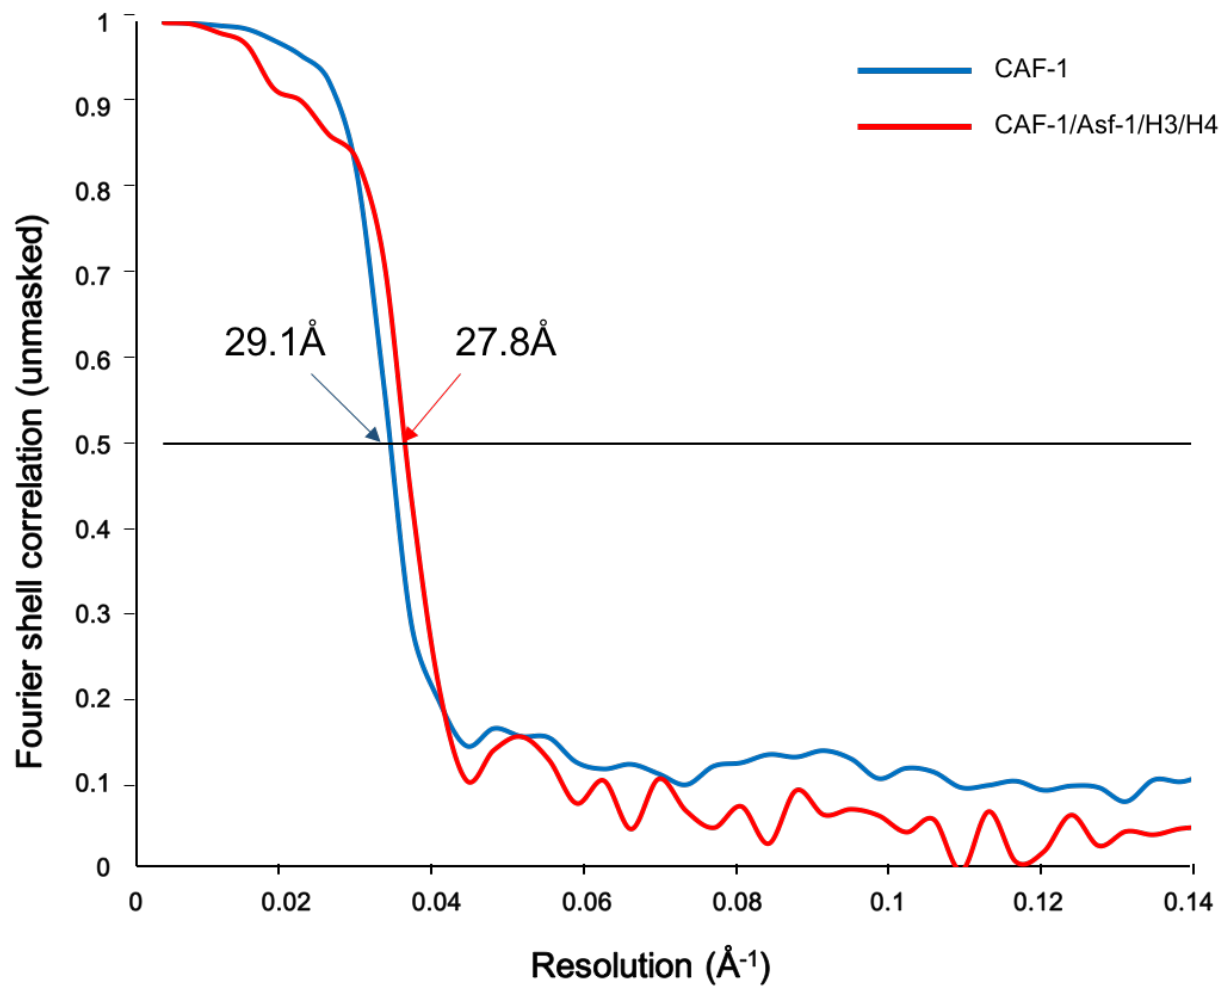

**Supplementary Figure 3. Fourier Shell Correlation Curves.**

FSC for CAF-1 (Blue) and CAF-1\_H3/H4\_Asf-1 (Red) indicates the resolution for the 3D reconstructions with 29.1  $\text{\AA}$  and 27.8  $\text{\AA}$  respectively

CAF-1

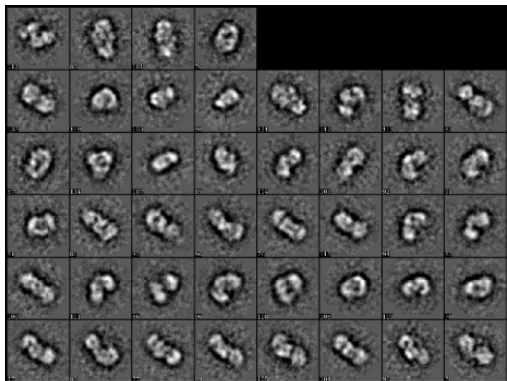

CAF-1/Asf-1/H3/H4

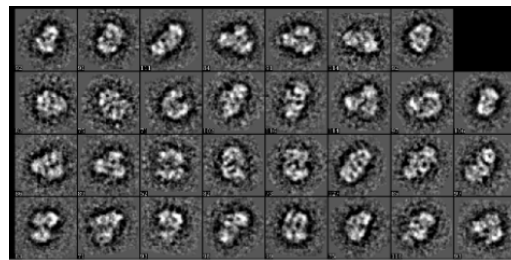

**Supplementary Figure 4. 2D class averages for yCAF-1 and yCAF-1\_H3/H4\_Asf-1 used for 3D reconstruction.**

**a**

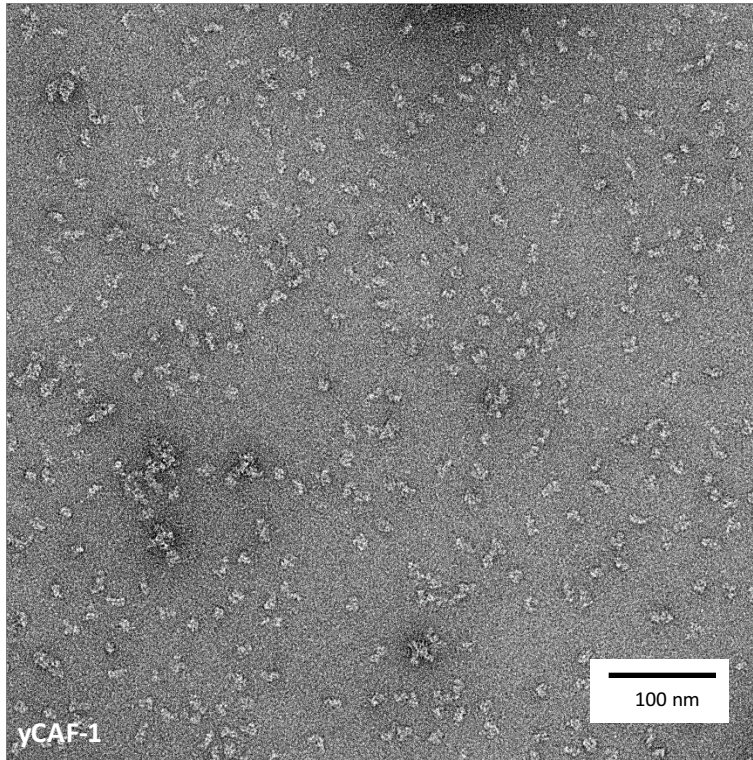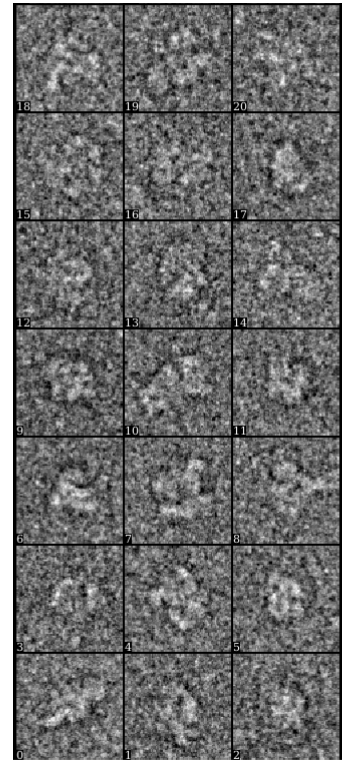

**b**

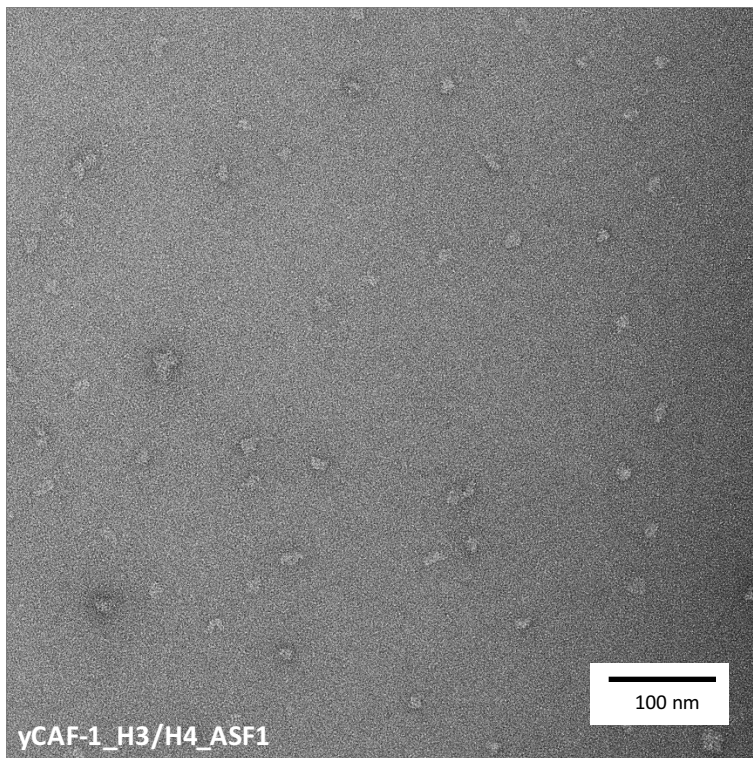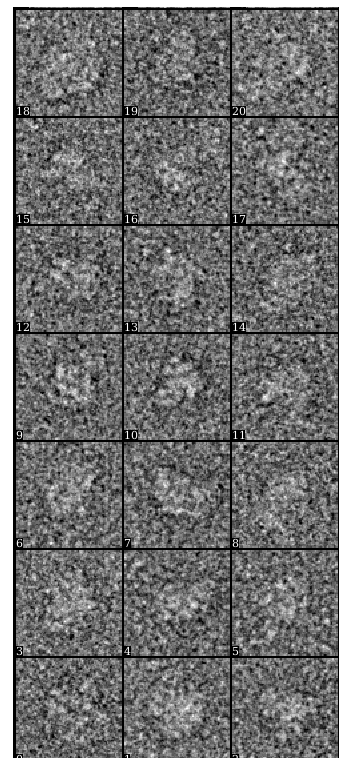

**Supplementary Figure 5**

Representative micrographs and particles of yCAF-1 (a) and yCAF-1\_H3/H4\_ASF1 complex (b)

**Supplementary Table 1. Cross-linked peptides of yeast CAF-1**

| <b>Cross-linked Peptide ID</b>                    | <b>Protein1</b> | <b>Protein2</b> | <b>Position1</b> | <b>Position2</b> |
|---------------------------------------------------|-----------------|-----------------|------------------|------------------|
| GILSFFQNTTTVKSNK-KEKLQSNR-a13-b3                  | CAC1            | CAC3            | 30               | 287              |
| LLCYKNSPIQSTK-LFTAGGDNKVR-a5-b9                   | CAC1            | CAC2            | 92               | 38               |
| KLSDSNTPVVEK-LFTAGGDNKVR-a1-b9                    | CAC1            | CAC2            | 236              | 38               |
| KLSDSNTPVVEK-TKHGSTR-a1-b2                        | CAC1            | CAC3            | 236              | 161              |
| KLSDSNTPVVEK-EKLQSNR-a1-b2                        | CAC1            | CAC3            | 236              | 287              |
| KLSDSNTPVVEK-QSKISHPFETK-a1-b3                    | CAC1            | CAC3            | 236              | 171              |
| SDYEKFFLPFYAK-QSKISHPFETK-a5-b3                   | CAC1            | CAC3            | 252              | 171              |
| IDDELLNSKDK-EKLQSNR-a9-b2                         | CAC1            | CAC3            | 291              | 287              |
| KIDDELLNSKDK-EKLQSNR-a10-b2                       | CAC1            | CAC3            | 291              | 287              |
| DKTSSDLLNWLQSR-EKHDGGVNSCR-a2-b2                  | CAC1            | CAC3            | 293              | 294              |
| DKTSSDLLNWLQSR-EKLQSNR-a2-b2                      | CAC1            | CAC3            | 293              | 287              |
| KAVDVLQQMPLK-LFTAGGDNKVR-a1-b9                    | CAC1            | CAC2            | 317              | 38               |
| RKAVDVLQQMPLK-LFTAGGDNKVR-a2-b9                   | CAC1            | CAC2            | 317              | 38               |
| EKTDELQSLLAQVPHK-NTKLLYDYLNTNSTK-a2-b3            | CAC1            | CAC3            | 330              | 31               |
| KFVGPLIPTICLK-LFTAGGDNKVR-a1-b9                   | CAC1            | CAC2            | 444              | 38               |
| AEVIIETDGPIDPFKEPK-SVLKLPYK-a15-b4                | CAC1            | CAC2            | 489              | 339              |
| SNSDLQAQTASQSQSPEKK-IAKAELPCPGDVLR-a18-b3         | CAC1            | CAC2            | 518              | 235              |
| LFDGVQDSTFSLGTVEIAQKNLPQYNK-IAKAELPCPGDVLR-a21-b3 | CAC1            | CAC2            | 553              | 235              |
| SSGKGDLPV-SVLKLPYK-a4-b4                          | CAC1            | CAC2            | 577              | 339              |
| LFTAGGDNKVR-LKKEEEIR-a9-b3                        | CAC2            | CAC1            | 38               | 212              |
| IAKAELPCPGDVLR-SSGKGDLPV-a3-b4                    | CAC2            | CAC1            | 235              | 577              |
| IAKAELPCPGDVLR-NTIKEYAIR-a3-b4                    | CAC2            | CAC1            | 235              | 568              |
| IAKAELPCPGDVLR-QTIKNTIK-a3-b4                     | CAC2            | CAC1            | 235              | 564              |
| IAKAELPCPGDVLR-QKAMITDPMDLLR-a3-b2                | CAC2            | CAC1            | 235              | 521              |
| IAKAELPCPGDVLR-NLPQYNKQTIK-a3-b7                  | CAC2            | CAC1            | 235              | 560              |

|                                         |      |      |     |     |
|-----------------------------------------|------|------|-----|-----|
| SGILNSAGGVKNRPAIR-QKAMITDPMDLLR-a11-b2  | CAC2 | CAC1 | 306 | 521 |
| SGILNSAGGVKNRPAIR-SSGKGDLPK-a11-b4      | CAC2 | CAC1 | 306 | 577 |
| SGILNSAGGVKNRPAIR-NTIKEYAIR-a11-b4      | CAC2 | CAC1 | 306 | 568 |
| SGILNSAGGVKNRPAIR-SSGKGDLPK-a11-b4      | CAC2 | CAC1 | 306 | 577 |
| KPALMAAFSPVFYETCQK-KFVGPLIPTICLK-a1-b1  | CAC2 | CAC1 | 318 | 444 |
| KPALMAAFSPVFYETCQK-SSGKGDLPK-a1-b4      | CAC2 | CAC1 | 318 | 577 |
| KPALMAAFSPVFYETCQK-RKFGVPLIPTICLK-a1-b2 | CAC2 | CAC1 | 318 | 444 |
| SVLKLPHYK-TSSLPSKR-a4-b7                | CAC2 | CAC1 | 339 | 499 |
| EAGGIVNMLPVKK-TSSLPSKR-a12-b7           | CAC2 | CAC1 | 447 | 499 |
| NTKLLYDYLNTNSTK-KAVDVLQQMPLK-a3-b1      | CAC3 | CAC1 | 31  | 317 |
| NTKLLYDYLNTNSTK-AVDVLQQMPLKEK-a3-b11    | CAC3 | CAC1 | 31  | 328 |
| QSKISHPFETK-LKEEAK-a3-b2                | CAC3 | CAC1 | 171 | 219 |
| QSKISHPFETK-LKEEAKER-a3-b6              | CAC3 | CAC1 | 171 | 223 |
| QSKISHPFETK-IGNFFKK-a3-b6               | CAC3 | CAC1 | 171 | 235 |
| QSKISHPFETK-LKKEEEIR-a3-b3              | CAC3 | CAC1 | 171 | 212 |
| EKHDGGVNSCR-LKKEEEIR-a2-b2              | CAC3 | CAC1 | 294 | 211 |
| EKHDGGVNSCR-LKKEEEIR-a2-b3              | CAC3 | CAC1 | 294 | 212 |
| EKHDGGVNSCR-ELKVEEER-a2-b3              | CAC3 | CAC1 | 294 | 172 |
| FNYKNSLILASADSNR-KIDDELLNSK-a4-b1       | CAC3 | CAC1 | 307 | 282 |
| FNYKNSLILASADSNR-RKIDDELLNSK-a4-b2      | CAC3 | CAC1 | 307 | 282 |



**Supplementary Table 2. Cross-linked peptides of yeast CAF-1\_HistoneH3/H4**

| <b>Cross-linked Peptide ID</b>                    | <b>Protein1</b> | <b>Protein2</b> | <b>Position1</b> | <b>Position2</b> |
|---------------------------------------------------|-----------------|-----------------|------------------|------------------|
| KLSDSNTPVVEK-TKHGSTR-a1-b2                        | CAC1            | CAC3            | 236              | 161              |
| KLSDSNTPVVEK-EKLQSNR-a1-b2                        | CAC1            | CAC3            | 236              | 287              |
| KLSDSNTPVVEKSDYEK-QSKISHPFETK-a12-b3              | CAC1            | CAC3            | 247              | 171              |
| SDYEKFFLPFYAK-QSKISHPFETK-a5-b3                   | CAC1            | CAC3            | 252              | 171              |
| FFLPFYAKDGVR-YQKSTELLIR-a8-b3                     | CAC1            | H3              | 260              | 57               |
| IDDELLNSKDK-EKLQSNR-a9-b2                         | CAC1            | CAC3            | 291              | 287              |
| KIDDELLNSKDK-EKLQSNR-a10-b2                       | CAC1            | CAC3            | 291              | 287              |
| DKTSSDLLNWLQSR-EKHDGGVNSCR-a2-b2                  | CAC1            | CAC3            | 293              | 294              |
| AVDVLQQMPLKEK-YQKSTELLIR-a11-b3                   | CAC1            | H3              | 328              | 57               |
| AVDVLQQMPLKEK-RYQKSTELLIR-a11-b4                  | CAC1            | H3              | 328              | 57               |
| AVDVLQQMPLKEK-LFTAGGDNKVR-a11-b9                  | CAC1            | CAC2            | 328              | 38               |
| EKTDELQSLLAQVPHK-YQKSTELLIR-a2-b3                 | CAC1            | H3              | 330              | 57               |
| EKTDELQSLLAQVPHK-RYQKSTELLIR-a2-b4                | CAC1            | H3              | 330              | 57               |
| EKTDELQSLLAQVPHK-NTKLLYDYLNTNSTK-a2-b3            | CAC1            | CAC3            | 330              | 31               |
| KFVGPLIPTICLK-YQKSTELLIR-a1-b3                    | CAC1            | H3              | 444              | 57               |
| RKFVGPLIPTICLK-KLPFQR-a2-b1                       | CAC1            | H3              | 444              | 65               |
| KFVGPLIPTICLK-KLPFQR-a1-b1                        | CAC1            | H3              | 444              | 65               |
| RKFVGPLIPTICLK-YQKSTELLIR-a2-b3                   | CAC1            | H3              | 444              | 57               |
| AEVIIETDGPIDPFKEPK-SVLKLPYK-a15-b4                | CAC1            | CAC2            | 489              | 339              |
| AEVIIETDGPIDPFKEPKTSSLPSK-SVLKLPYK-a15-b4         | CAC1            | CAC2            | 489              | 339              |
| AEVIIETDGPIDPFKEPK-EAGGIVNMLPVKK-a15-b12          | CAC1            | CAC2            | 489              | 447              |
| AEVIIETDGPIDPFKEPK-KIPCNSSDSKK-a15-b10            | CAC1            | CAC2            | 489              | 457              |
| SNSDLQAQTASQSQSPEKK-IAKAELPCGDVLR-a18-b3          | CAC1            | CAC2            | 518              | 235              |
| LFDGVQDSTFSLGTVEIAQKNLPQYNK-IAKAELPCGDVLR-a21-b3  | CAC1            | CAC2            | 553              | 235              |
| LFDGVQDSTFSLGTVEIAQKNLPQYNK-EAGGIVNMLPVKK-a21-b12 | CAC1            | CAC2            | 553              | 447              |

|                                               |      |      |     |     |
|-----------------------------------------------|------|------|-----|-----|
| LFTAGGDNKVRIWK-SRSSPCSKR-a9-b9                | CAC2 | CAC1 | 38  | 129 |
| KIESLDFGLSLTHHEQAINVIR-AVDVLQQMPLKEK-a1-b11   | CAC2 | CAC1 | 57  | 328 |
| IAKAELPCPGDVLVLR-SSGKGDLPVLR-a3-b4            | CAC2 | CAC1 | 235 | 577 |
| IAKAELPCPGDVLVLR-NTIKEYAIR-a3-b4              | CAC2 | CAC1 | 235 | 568 |
| IAKAELPCPGDVLVLR-QKAMITDPMDLLR-a3-b2          | CAC2 | CAC1 | 235 | 521 |
| IAKAELPCPGDVLVLR-DAVITYTEHAKRK-a3-b10         | CAC2 | H4   | 235 | 78  |
| SGILNSAGGVKNRPAIR-SSGKGDLPVLR-a11-b4          | CAC2 | CAC1 | 306 | 577 |
| SGILNSAGGVKNRPAIR-NTIKEYAIR-a11-b4            | CAC2 | CAC1 | 306 | 568 |
| KPALMAAFSPVIFYETCQK-KFVGPLIPTICLK-a1-b1       | CAC2 | CAC1 | 318 | 444 |
| KPALMAAFSPVIFYETCQK-RKFVGPLIPTICLK-a1-b2      | CAC2 | CAC1 | 318 | 444 |
| KPALMAAFSPVIFYETCQKSVLK-SSGKGDLPVLR-a18-b4    | CAC2 | CAC1 | 335 | 577 |
| KPALMAAFSPVIFYETCQKSVLK-TSSLPSKR-a18-b7       | CAC2 | CAC1 | 335 | 499 |
| KPALMAAFSPVIFYETCQKSVLK-QKAMITDPMDLLR-a18-b2  | CAC2 | CAC1 | 335 | 521 |
| IEPPAMHAELDTDESAAKNQR-SSGKGDLPVLR-a21-b4      | CAC2 | CAC1 | 432 | 577 |
| ISTLGHIKWSSLNFDMDMEFEKPENSTR-YQKSTELLIR-a8-b3 | CAC3 | H3   | 92  | 57  |
| QSKISHPFETK-IGNFFKK-a3-b6                     | CAC3 | CAC1 | 171 | 235 |
| IRQSKISHPFETK-KLSDSNTPVVEK-a5-b1              | CAC3 | CAC1 | 171 | 236 |
| QSKISHPFETK-LKKEEEIR-a3-b3                    | CAC3 | CAC1 | 171 | 212 |
| QSKISHPFETK-LKEEAK-a3-b2                      | CAC3 | CAC1 | 171 | 219 |
| QSKISHPFETK-LKKEEEIR-a3-b2                    | CAC3 | CAC1 | 171 | 211 |
| QSKISHPFETK-RKEEER-a3-b2                      | CAC3 | CAC1 | 171 | 205 |
| EKHDGGVNSCR-ELKVEEER-a2-b3                    | CAC3 | CAC1 | 294 | 172 |
| EKHDGGVNSCR-ELLRQEEKK-a2-b8                   | CAC3 | CAC1 | 294 | 166 |
| FNYKNSLILASADSNR-RKIDDELLNSK-a4-b2            | CAC3 | CAC1 | 307 | 282 |
| FNYKNSLILASADSNR-KIDDELLNSK-a4-b1             | CAC3 | CAC1 | 307 | 282 |
| KLPFQRLVLR-QEEKKK-a1-b4                       | H3   | CAC1 | 65  | 166 |
| DNIQGITKPAIR-ELKVEEER-a8-b3                   | H4   | CAC1 | 32  | 172 |
| GLGKGGAK-HRKELLR-a4-b3                        | H4   | CAC1 | 13  | 158 |

|                                |    |      |    |     |
|--------------------------------|----|------|----|-----|
| DNIQGITKPAIRR-EKELKK-a8-b2     | H4 | CAC1 | 32 | 144 |
| DAVTYTEHAKR-EIAQDFKTDLR-a10-b7 | H4 | H3   | 78 | 80  |

**Supplementary Table 3. Cross-linked peptides of yeast CAF-1\_HistoneH3/H4\_Asf1**

| <b>Cross-linked Peptide ID</b>               | <b>Protein1</b> | <b>Protein2</b> | <b>Position1</b> | <b>Position2</b> |
|----------------------------------------------|-----------------|-----------------|------------------|------------------|
| FLTKEKDVITLDDPK-MSGRGKGGK-a6-b6              | CAC1            | H4              | 39               | 6                |
| LKKEEEIR-EKLQSNR-a2-b2                       | CAC1            | CAC3            | 211              | 287              |
| KLSDSNTPVVEK-EKLQSNR-a1-b2                   | CAC1            | CAC3            | 236              | 287              |
| KLSDSNTPVVEK-QSKISHPFETK-a1-b3               | CAC1            | CAC3            | 236              | 171              |
| SDYEKFFLPFYAK-TKHGSTR-a5-b2                  | CAC1            | CAC3            | 252              | 161              |
| SDYEKFFLPFYAK-QSKISHPFETK-a5-b3              | CAC1            | CAC3            | 252              | 171              |
| KIDDELLNSKDK-EKLQSNR-a10-b2                  | CAC1            | CAC3            | 291              | 287              |
| IDDELLNSKDK-EKLQSNR-a9-b2                    | CAC1            | CAC3            | 291              | 287              |
| DKTSSDLLNWLQSR-EKHDGGVNSCR-a2-b2             | CAC1            | CAC3            | 293              | 294              |
| RKAVDVLQQMPLK-LFTAGGDNKVR-a2-b9              | CAC1            | CAC2            | 317              | 38               |
| EKTDELQSLLAQVPHK-NTKLLYDYLNTNSTK-a2-b3       | CAC1            | CAC3            | 330              | 31               |
| EKTDELQSLLAQVPHK-EKHDGGVNSCR-a2-b2           | CAC1            | CAC3            | 330              | 294              |
| KFVGPLIPTICLK-KLPFQR-a1-b1                   | CAC1            | H3              | 444              | 65               |
| KFVGPLIPTICLK-YQKSTELLIR-a1-b3               | CAC1            | H3              | 444              | 57               |
| AEVIIETDGPIDPFKEPK-SVLKLPYK-a15-b4           | CAC1            | CAC2            | 489              | 339              |
| AEVIIETDGPIDPFKEPK-SGILNSAGGVKNRPAIR-a15-b11 | CAC1            | CAC2            | 489              | 306              |
| AEVIIETDGPIDPFKEPKTSSLPSK-SVLKLPYK-a18-b4    | CAC1            | CAC2            | 492              | 339              |
| RSNSDLQAQTASQSQSPEKK-IAKAELPCPGDVLR-a19-b3   | CAC1            | CAC2            | 518              | 235              |
| LFTAGGDNKVR-YQKSTELLIR-a9-b3                 | CAC2            | H3              | 38               | 57               |
| IAKAELPCPGDVLR-NTIKEYAIR-a3-b4               | CAC2            | CAC1            | 235              | 568              |
| IAKAELPCPGDVLR-SSGKGDLPK-a3-b4               | CAC2            | CAC1            | 235              | 577              |
| IAKAELPCPGDVLR-DAVITYTEHAQR-a3-b10           | CAC2            | H4              | 235              | 78               |
| IAKAELPCPGDVLR-QKAMITDPMDLLR-a3-b2           | CAC2            | CAC1            | 235              | 521              |
| KPALMAAFSPVYETCQK-KFVGPLIPTICLK-a1-b1        | CAC2            | CAC1            | 318              | 444              |

|                                                    |      |      |     |     |
|----------------------------------------------------|------|------|-----|-----|
| KPALMAAFSPVIFYETCQK-RKFVGPLIPTICLK-a1-b2           | CAC2 | CAC1 | 318 | 444 |
| KPALMAAFSPVIFYETCQKSVLK-KEEEIRLK-a18-b1            | CAC2 | CAC1 | 335 | 212 |
| KPALMAAFSPVIFYETCQKSVLK-TSSLPSKR-a18-b7            | CAC2 | CAC1 | 335 | 499 |
| KPALMAAFSPVIFYETCQKSVLK-QTIKNTIK-a18-b4            | CAC2 | CAC1 | 335 | 564 |
| IEPPAMHAEPLDDESAVAAKNQR-AEVIIETDGPIDPFKEPK-a21-b15 | CAC2 | CAC1 | 432 | 489 |
| NTKLLYDYLNTNSTK-AVDVLQQMPLKEK-a3-b11               | CAC3 | CAC1 | 31  | 328 |
| QSKISHPFETK-LKEEAKER-a3-b6                         | CAC3 | CAC1 | 171 | 223 |
| QSKISHPFETK-LKEEAK-a3-b2                           | CAC3 | CAC1 | 171 | 219 |
| QSKISHPFETK-LKKEEEIR-a3-b3                         | CAC3 | CAC1 | 171 | 212 |
| QSKISHPFETK-RAELKK-a3-b5                           | CAC3 | CAC1 | 171 | 184 |
| FNYKNSLILASADSNR-RKIDDELLNSK-a4-b2                 | CAC3 | CAC1 | 307 | 282 |
| FNYKNSLILASADSNR-KIDDELLNSK-a4-b1                  | CAC3 | CAC1 | 307 | 282 |
| KLPFQRLVR-QEEKKK-a1-b4                             | H3   | CAC1 | 65  | 166 |
| KLPFQRLVR-QEEKKK-a1-b5                             | H3   | CAC1 | 65  | 167 |
